# Supplementary material
Source: Elsevier journal article supplement (https://www.sciencedirect.com/science/article/pii/S0300893224005116)
Supplement: mmc1 [file mmc1.pdf]

**Table 1 of the supplementary data.** Number of included patients, inclusion period, and responsible investigators by participating center

| Participating centers/Responsible investigators                            | Inclusion period of | Number of patients included |
|----------------------------------------------------------------------------|---------------------|-----------------------------|
| Quebec Heart & Lung Institute (Canada)<br>Dr Josep Rodes-Cabau             | 2014-2023           | 2084                        |
| Hôpital Cardiologique Haut-Lévêque (France)<br>Dr Julien Ternacle          | 2016-2020           | 1105                        |
| Bichat–Claude Bernard Hospital (France)<br>Dr Marina Urena                 | 2015-2020           | 724                         |
| Hospital Central de Asturias (Spain)<br>Dr Alberto Alperi                  | 2015-2020           | 668                         |
| Southlake Regional Health Centre Newmarket (Canada)<br>Dr Asim Cheema      | 2016-2020           | 656                         |
| Hospital Marqués de Valdecilla (Spain)<br>Dr Gabriela Veiga-Fernandez      | 2015-2021           | 651                         |
| Hospital Clínico San Carlos (Spain)<br>Dr Luis Nombela-Franco              | 2015-2020           | 520                         |
| Hospital Germans Trias i Pujol (Spain)<br>Dr Victoria Vilalta              | 2016-2021           | 494                         |
| Naples Federico II (Italy)<br>Dr Giovanni Esposito                         | 2015-2022           | 460                         |
| Toulouse University Hospital (France)<br>Dr Francisco Campelo-Parada       | 2014-2019           | 453                         |
| Magna Graecia' University (Italy)<br>Dr Ciro Idolfi                        | 2015-2021           | 413                         |
| Hospital Puerta Hierro (Spain)<br>Dr Maria del Trigo                       | 2016-2022           | 390                         |
| Hospital Regional Virgen de la Victoria (Spain)<br>Dr Antonio Munoz-Garcia | 2017-2020           | 348                         |
| Hospital Doce de Octubre (Spain)<br>Dr Nicolas Maneiro                     | 2016-2022           | 338                         |
| Hospital de la Santa Creu i Sant Pau (Spain)<br>Dr Luis Asmarats           | 2018-2020           | 245                         |

|                                                           |           |     |
|-----------------------------------------------------------|-----------|-----|
| Hospital Clínic de Barcelona (Spain)<br>Dr Ander Regueiro | 2016-2019 | 219 |
| Hospital La Princesa (Spain)<br>Dr David del Val          | 2016-2020 | 196 |
| Hospital Vall d'Hebron (Spain)<br>Dr Vicenç Serra         | 2016      | 67  |
| Rennes University Hospital (Spain)<br>Dr Vincent Auffret  | 2018      | 47  |

**Table 2 of the supplementary data.** Individual early safety endpoint definitions according to VARC-3 criteria

| VARC-3 individual endpoint             | VARC-3 definition                                                                                                                                                                                                                                                                                                                                                                                                                                                                                                                                                                                                                                                                                                                                                                                                                                                                                                                                                                                                                                                                                                                                                                                                                                                                                                                                                                                                                                                    | Study definition<br>(Identical, modified, not available) |
|----------------------------------------|----------------------------------------------------------------------------------------------------------------------------------------------------------------------------------------------------------------------------------------------------------------------------------------------------------------------------------------------------------------------------------------------------------------------------------------------------------------------------------------------------------------------------------------------------------------------------------------------------------------------------------------------------------------------------------------------------------------------------------------------------------------------------------------------------------------------------------------------------------------------------------------------------------------------------------------------------------------------------------------------------------------------------------------------------------------------------------------------------------------------------------------------------------------------------------------------------------------------------------------------------------------------------------------------------------------------------------------------------------------------------------------------------------------------------------------------------------------------|----------------------------------------------------------|
| All-cause mortality                    | Defined as 30-day or in-hospital cardiovascular or noncardiovascular mortality.                                                                                                                                                                                                                                                                                                                                                                                                                                                                                                                                                                                                                                                                                                                                                                                                                                                                                                                                                                                                                                                                                                                                                                                                                                                                                                                                                                                      | Identical                                                |
| Stroke                                 | Ischemic, hemorrhagic or not otherwise specified were included.                                                                                                                                                                                                                                                                                                                                                                                                                                                                                                                                                                                                                                                                                                                                                                                                                                                                                                                                                                                                                                                                                                                                                                                                                                                                                                                                                                                                      | Identical                                                |
| Bleeding type 2, 3, and 4              | <ul style="list-style-type: none"> <li>Type 2: <i>a)</i> overt bleeding requiring a transfusion of 2-4 units of whole blood/red blood cells; <i>b)</i> overt bleeding associated with a hemoglobin drop of <math>&gt; 3</math> g/dL (<math>&gt; 1.86</math> mmol/L) but <math>&lt; 5</math> g/d (<math>&lt; 3.1</math> mmol/L).</li> <li>Type 3: <i>a)</i> overt bleeding in a critical organ, such as intracranial, intraspinal, intraocular, pericardial (associated with hemodynamic compromise/tamponade and necessitating intervention), or intramuscular with compartment syndrome; <i>b)</i> overt bleeding causing hypovolemic shock or severe hypotension (systolic blood pressure <math>&lt; 90</math> mmHg lasting <math>&gt; 30</math> min and not responding to volume resuscitation) or requiring vasopressors or surgery; <i>d)</i> overt bleeding requiring reoperation, surgical exploration, or reintervention for the purpose of controlling bleeding; <i>e)</i> postthoracotomy chest tube output <math>\geq 2</math> L within a 24-h period; <i>f)</i> overt bleeding requiring a transfusion of <math>\geq 5</math> units of whole blood/red blood cells; <i>g)</i> overt bleeding associated with a hemoglobin drop <math>\geq 5</math> g/dL (<math>\geq 3.1</math> mmol/L).</li> <li>Type 4: overt bleeding leading to death. Should be classified as: probable: clinical suspicion or definite: confirmed by autopsy or imaging.</li> </ul> | Identical                                                |
| Major vascular complication            | <p>One of the following:</p> <p><i>a)</i> Aortic dissection or aortic rupture.</p> <p><i>b)</i> Vascular (arterial or venous) injury (perforation, rupture, dissection, stenosis, ischemia, arterial or venous thrombosis including pulmonary embolism, arteriovenous fistula, pseudoaneurysm, hematoma, retroperitoneal hematoma, infection) or compartment syndrome resulting in death, VARC type <math>\geq 2</math> bleeding, limb or visceral ischemia, or irreversible neurologic impairment.</p> <p><i>c)</i> Distal embolization (noncerebral) from a vascular source resulting in death, amputation, limb or visceral ischemia, or irreversible end-organ damage.</p> <p><i>e)</i> Unplanned endovascular or surgical intervention resulting in death, VARC type <math>\geq 2</math> bleeding, limb or visceral ischemia, or irreversible neurologic impairment.</p> <p><i>f)</i> Closure device failure resulting in death, VARC type <math>\geq 2</math> bleeding, limb or visceral ischemia, or irreversible neurologic impairment.</p>                                                                                                                                                                                                                                                                                                                                                                                                                  | Identical                                                |
| Major access-related complication      | <p>One of the following:</p> <p><i>a)</i> Nonvascular structure, noncardiac structure perforation, injury, or infection resulting in death, VARC type <math>\geq 2</math> bleeding, irreversible nerve injury or requiring unplanned surgery or percutaneous intervention.</p> <p><i>b)</i> Nonvascular access site (eg, transapical left ventricular) perforation, injury, or infection resulting in death, VARC type <math>\geq 2</math> bleeding, irreversible nerve injury or requiring unplanned surgery or percutaneous intervention.</p>                                                                                                                                                                                                                                                                                                                                                                                                                                                                                                                                                                                                                                                                                                                                                                                                                                                                                                                      | Identical                                                |
| Major cardiac structural complications | One of the following:                                                                                                                                                                                                                                                                                                                                                                                                                                                                                                                                                                                                                                                                                                                                                                                                                                                                                                                                                                                                                                                                                                                                                                                                                                                                                                                                                                                                                                                | Identical                                                |

|                                         |                                                                                                                                                                                                                                                                                                                                                                                                                                                                                                                                                                                                                                                                                                                                                                                                                                                                                                                                                                                                                                                                                    |           |
|-----------------------------------------|------------------------------------------------------------------------------------------------------------------------------------------------------------------------------------------------------------------------------------------------------------------------------------------------------------------------------------------------------------------------------------------------------------------------------------------------------------------------------------------------------------------------------------------------------------------------------------------------------------------------------------------------------------------------------------------------------------------------------------------------------------------------------------------------------------------------------------------------------------------------------------------------------------------------------------------------------------------------------------------------------------------------------------------------------------------------------------|-----------|
|                                         | <p><i>a)</i> Cardiac structure perforation, injury, or compromise resulting in death, VARC type <math>\geq 2</math> bleeding, hemodynamic compromise or tamponade, or requiring unplanned surgical or percutaneous intervention.</p> <p><i>b)</i> New pericardial effusion resulting in death, VARC type <math>\geq 2</math> bleeding, hemodynamic compromise or tamponade, or requiring unplanned surgical or percutaneous intervention.</p> <p><i>c)</i> Coronary obstruction resulting in death, hemodynamic compromise, myocardial infarction, or unplanned surgical or percutaneous intervention. Coronary obstruction may be acute (during the procedure) or delayed (after completion of the procedure).</p> <p><i>d)</i> Coronary artery access difficulties for needed coronary angiography or intervention, resulting in death, hemodynamic compromise, myocardial infarction, coronary or aortic root injury, compromise in aortic valve prosthesis integrity, unplanned surgical or percutaneous intervention, or the inability to perform the intended procedure.</p> |           |
| Acute kidney injury type 3, and 4       | <ul style="list-style-type: none"> <li>• Stage 3: acute kidney disease that fulfils at least 1 of the following criteria: <i>a)</i> an increase in serum creatinine <math>&gt;300\%</math> (<math>&gt; 3.0 \times</math> increase) within 7 days compared with baseline; <i>b)</i> serum creatinine <math>\geq 4.0</math> mg/dL (<math>\geq 354</math> mmol/L) with an acute increase of <math>\geq 0.5</math> mg/dL (<math>\geq 44</math> micromol/L).</li> <li>• Stage 4: acute kidney disease requiring new temporary or permanent renal replacement therapy.</li> </ul>                                                                                                                                                                                                                                                                                                                                                                                                                                                                                                        | Identical |
| Moderate or severe aortic regurgitation | Aortic regurgitation greater than mild in the postprocedural transthoracic echocardiogram.                                                                                                                                                                                                                                                                                                                                                                                                                                                                                                                                                                                                                                                                                                                                                                                                                                                                                                                                                                                         | Identical |
| New permanent pacemaker                 | New implant due to procedure-related conduction abnormalities.                                                                                                                                                                                                                                                                                                                                                                                                                                                                                                                                                                                                                                                                                                                                                                                                                                                                                                                                                                                                                     | Identical |
| Surgical conversion or intervention     | Need for a new interventional procedure or surgery.                                                                                                                                                                                                                                                                                                                                                                                                                                                                                                                                                                                                                                                                                                                                                                                                                                                                                                                                                                                                                                | Identical |

**Table 3 of the supplementary data.** Incidence of early safety and each individual endpoint according to VARC-3 criteria, including only type 3-4 bleeding

|                                                                     | <b>Total</b>     |
|---------------------------------------------------------------------|------------------|
|                                                                     | <b>N =10 078</b> |
| Early safety                                                        | 7433 (73.8)      |
| All-cause death                                                     | 262 (2.6)        |
| Stroke                                                              | 207 (2.1)        |
| Bleeding type 3 and 4                                               | 426 (4.2)        |
| Major vascular, access-related, or cardiac structural complications | 800 (7.9)        |
| Acute kidney injury type 3, and 4                                   | 296 (2.9)        |
| Moderate or severe aortic regurgitation                             | 46 (0.5)         |
| New permanent pacemaker                                             | 1373 (13.6)      |
| Surgical conversion or intervention                                 | 66 (0.7)         |

**Table 4 of the supplementary data.** Incidence of early safety and each individual endpoint according to VARC-2 criteria

|                                                      | <b>Total</b>      |
|------------------------------------------------------|-------------------|
|                                                      | <b>N = 10 078</b> |
| Early safety                                         | 8296 (82.3)       |
| All-cause mortality                                  | 262 (2.6)         |
| All stroke (disabling and nondisabling)              | 207 (2.1)         |
| Life-threatening bleeding                            | 465 (4.6)         |
| Acute kidney injury—stage 2 or 3                     | 296 (2.9)         |
| Coronary artery obstruction                          | 52 (0.5)          |
| Major vascular complication                          | 708 (7.0)         |
| Valve-related dysfunction requiring repeat procedure | 127 (1.3)         |

**Figure 1 of the supplementary data.** Landmark analysis at 30 days with Kaplan-Meier estimates for all-cause mortality according to the presence of early safety defined as per VARC-3 criteria

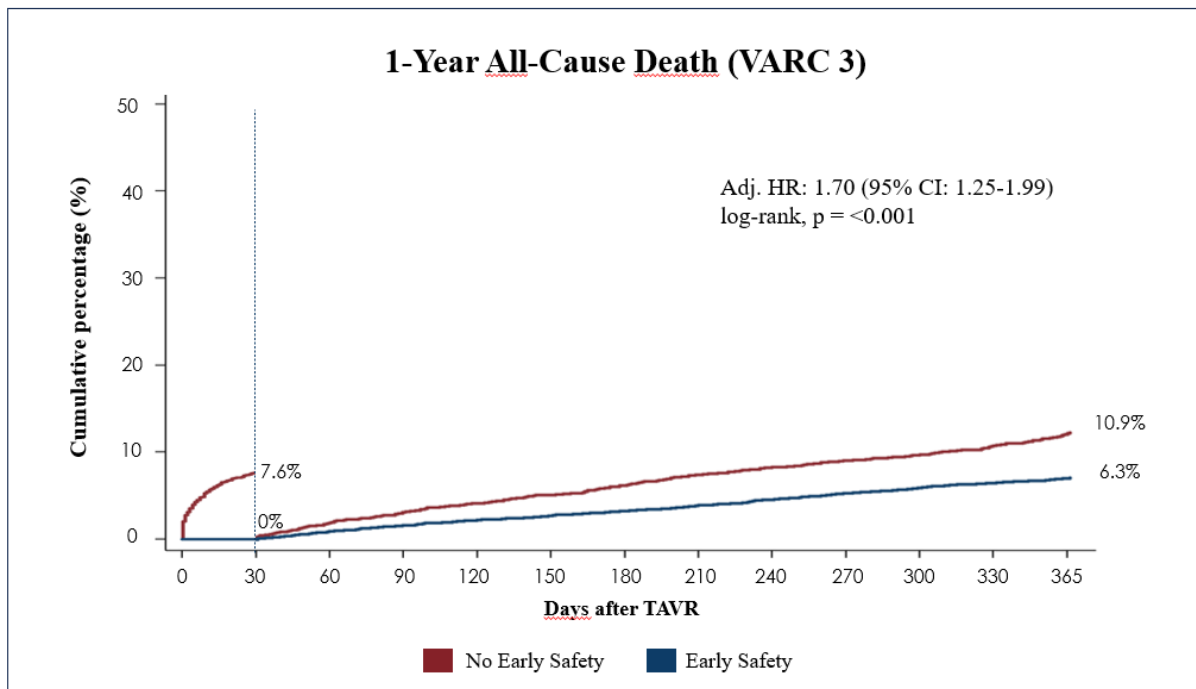

Thirty-day all-cause mortality: 0% in early safety (ES) patients and 7.62% in no-ES patients (95%CI: 6.83-8.65). From 30-days to 1 year all-cause mortality: 6.30% in ES patients (95%CI: 5.72-7.01) and 10.90% in no-ES patients (95%CI: 9.83 to 12.03).
